# Supplementary material for: Multi-Purpose Utility of Circulating Plasma DNA Testing in Patients with Advanced Cancers
Source: PLoS One. 2012 Nov 7;7(11):e47020. doi: 10.1371/journal.pone.0047020 (PMC3492590; doi:10.1371/journal.pone.0047020)
Supplement: Table S1 — Complete data set including list of FFPE tumor and cpDNA mutations, cpDNA concentrations and tumor characteristics. (XLS) [file pone.0047020.s001.xls]

## Sheet: Raw data
SUPPLEMENTAL TABLE 1
Patient	Cancer type	FFPE		FFPE		cpDNA		cpDNA		cpDNA Concentration	primary vs met	core vs section	Correlation	Days between biopsy and blood draw
		Mutation 1		Mutation 2		Mutation 1		Mutation 2		ng/mL of plasma
1	Colorectal	KRAS	G12C							25.5	primary	Core	NO	-1242
2	Colorectal					KRAS	G13D	PIK3CA	Q546K	106.75	met	Section	N/A	-533
3	Colorectal	KRAS	G13V			KRAS	G13V			62.6	primary	Core	YES	-249
4	Colorectal									6.35	primary	Core	No mutation	-575
5	Colorectal	KRAS	G12D			KRAS	G12D			24.85	primary	Core	YES	-1127
6	Colorectal									14.85	primary	Core	No mutation	-444
7	Colorectal									9.45	primary	Core	No mutation	-933
8	Colorectal									17.3	primary	Core	No mutation	-2087
9	Colorectal	KRAS	G12D	PIK3CA	Q546K	KRAS	G12D	PIK3CA	Q546K	12.45	primary	Core	YES	-965
10	Colorectal	KRAS	G13D			KRAS	G13D			29.95	primary	Section	YES	-1132
11	Colorectal									125.1	N/A	N/A	N/A	N/A
12	Colorectal	KRAS	G12D							9.95	primary	Core	NO	-2874
13	Colorectal	BRAF	V600E			BRAF	V600E			17.05	primary	Core	YES	-275
14	Colorectal	BRAF	V600E			BRAF	V600E			31.9	primary	Core	YES	-441
15	Colorectal	KRAS	G12V			KRAS	G12V			193.65	primary	Core	YES	-1874
16	Colorectal	BRAF	V600E			BRAF	V600E			10.3	primary	Core	YES	-944
17	Colorectal	KRAS	G12D	PIK3CA	E542K	KRAS	G12D			13.9	primary (KRAS G12D and PIK3CA: no mutations) / met (KRAS G12D and PIK3CA E542K)	Core	YES	-1251
18	Colorectal					KRAS	G13D			15.1	N/A	N/A	N/A	N/A
19	Colorectal	PIK3CA	E545K							18.05	primary	Core	NO	-315
20	Colorectal	AKT1	E17K			AKT1	E17K			6.2	met	Core	YES	-664
21	Colorectal					PIK3CA	E545K			62.45	primary	Core	NO	-775
22	Colorectal	KRAS	G13D			KRAS	G13D			48.7	met	Core	YES	-294
23	Colorectal									230.15	primary	Core	No mutation	-1123
24	Colorectal									25.4	met	Core	No mutation	-349
25	Colorectal	KRAS	G13D							5.3	primary	Core	NO	-640
	% samples with mutations	15 of 22	0.682			14 of 25	0.56
1	Melanoma									16.4	met	Core	No mutation	-206
2	Melanoma	NRAS	Q61R	MET	R970C	NRAS	Q61R	MET	R970C	23.75	met	Core	YES	-806
3	Melanoma	BRAF	V600E			BRAF	V600E			7.05	primary	Core	YES	-178
4	Melanoma	NRAS	Q61K			NRAS	Q61K			50.1	met	Core	YES	-555
5	Melanoma	NRAS	Q61R							19.9	primary	Core	NO	-136
6	Melanoma									5	N/A	N/A	N/A	N/A
7	Melanoma									3.55	N/A	N/A	N/A	N/A
8	Melanoma					MET	T992I			5.3	N/A	N/A	N/A	N/A
9	Melanoma	BRAF	V600E			BRAF	V600E			10	met	Section	YES	-1000
10	Melanoma									7	N/A	N/A	N/A	N/A
11	Melanoma	BRAF	V600E							4.75	met	Core	NO	-342
12	Melanoma	BRAF	V600E			BRAF	V600E			23	primary	Core	YES	-345
13	Melanoma	BRAF	V600E							4.9	met	Core	NO	-66
14	Melanoma									2.3	N/A	N/A	N/A	N/A
15	Melanoma									4	node	Core	No mutation	-104
	% samples with mutations	8 of 10	0.8			6 of 15	0.4
1	Breast									11	primary	Core	No mutation	-616
2	Breast									15.4	primary	Core	No mutation	-476
3	Breast									17.1	primary	Core	No mutation	-1345
4	Breast									12.3	primary	Core	No mutation	-1964
5	Breast									9.1	primary	Core	No mutation	-144
6	Breast									13.7	met	Core	No mutation	-441
7	Breast	PIK3CA	H1047R							0.5	primary	Core	NO	-77
8	Breast	PIK3CA	H1047R			PIK3CA	H1047R			40.7	primary	Core	YES	-1746
9	Breast									12.9	primary	Section	No mutation	-681
10	Breast									4.85	primary	Core	No mutation	-632
11	Breast	PIK3CA	H1047R			PIK3CA	H1047R			1600	primary	Core	YES	-4852
12	Breast	PIK3CA	H1047R			PIK3CA	H1047R			24.05	primary	Core	YES	-682
13	Breast									32.75	primary	Core	No mutation	-612
14	Breast									23.85	primary	Core	No mutation	-946
15	Breast									18.3	primary	Core	No mutation	-476
16	Breast									6.65	primary	Core	No mutation	-409
17	Breast									28.2	primary	Section	No mutation	-254
18	Breast	AKT1	E17K			AKT1	E17K			99.3	primary	Core	YES	-2487
19	Breast									37.1	primary	Core	No mutation	-1563
	% samples with mutations	5 of 19	0.263			4 of 19	0.211
1	Prostate					NRAS	Q61K			99.05	primary	Core	NO	-254
2	Prostate	PIK3CA	H1047R			PIK3CA	H1047R			40.25	primary	Section	YES	-876
3	Prostate									1177	primary	Core	No mutation	-589
4	Prostate									22.25	N/A	N/A	N/A	N/A
5	Prostate									29.75	N/A	N/A	N/A	N/A
6	Prostate									90.1	N/A	N/A	N/A	N/A
7	Prostate									66.8	primary	Section	N/A	-1178
8	Prostate	HRAS	Q61R							7.15	primary	Section	NO	-2519
9	Prostate									20.65	primary	Section	No mutation	-1397
10	Prostate									53.95	primary	Section	No mutation	-2199
11	Prostate	AKT1	E17K			AKT1	E17K			52.8	primary	Section	YES	-1059
	% samples with mutations	3 of 8	0.375			3 of 11	0.273
1	Ovarian									47.85	primary	Core	No mutation	-500
2	Ovarian									23.9	met	Core	No mutation	-1217
3	Ovarian	KRAS	G12V							3.95	primary	Core	NO	-823
4	Ovarian	KRAS	G12V							N/A	primary	Core	N/A	N/A
5	Ovarian									17.3	primary	Core	No mutation	-1456
6	Ovarian									6	N/A	N/A	N/A	N/A
7	Ovarian	PIK3CA	H1047R							13.05	primary	Core	NO	-134
8	Ovarian									5.1	met	Core	No mutation	-245
9	Ovarian	KRAS	G13D							8.85	met	Core	NO	-845
10	Ovarian									5.35	primary	Core	No mutation	-921
11	Ovarian									34.2	met	Core	No mutation	-2481
12	Ovarian									26.95	primary	Core	No mutation	-2912
13	Ovarian									4.4	primary	Core	No mutation	-492
14	Ovarian									24.55	primary	Core	No mutation	-197
15	Ovarian	KIT	P585P							N/A	primary	Core	NO	-561
	% samples with mutations	5 of 14	0.357			0 of 14	0
1	Glioblastome									2.65	N/A	N/A	N/A	N/A
2	ACUP	NRAS	G12D			NRAS	G12D			37.05	met	Core	YES	-256
3	Cervical									34	primary	Core	No mutation	-507
4	Cholangiocarcinoma					NRAS	G13R			22.3	primary	Core	NO	-325
5	Duodenal Carcinoma	KRAS	G12D							82.25	primary	Core	NO	-199
6	Endometrial									N/A	N/A	N/A	N/A	N/A
7	Endometrial									17.55	N/A	N/A	N/A	N/A
8	Lung									7.25	primary	Core	No mutation	-602
9	Lung									1.45	primary	Core	No mutation	-423
10	Lung									31.3	primary	Section	No mutation	-469
11	Lung									13.3	primary	Section	No mutation	-2005
12	Lung									38.1	N/A	N/A	N/A	N/A
13	Mesothelioma									N/A	primary	Core	No mutation	N/A
14	Mesothelioma									7.7	primary	Section	No mutation	-240
15	Mesothelioma									4.25	N/A	N/A	N/A	N/A
16	Oesophageal									31.15	primary	Core	No mutation	-240
17	Pancreas									6.4	N/A	N/A	N/A	N/A
18	Renal cell carcinoma									10.15	met	Section	No mutation	-798
19	Sarcoma									N/A	N/A	N/A	N/A	N/A
	Legend
	No mutation detected
	No specimen available for analysis

## Sheet: Concordance
All patients with matched samples including those with no mutations detected (n=83)
	primary	met
discordant	14	3	17
	0.2154	0.1667	0.2048
concordant	51	15	66
	0.7846	0.8333	0.7952
	65	18	83
	1	1	1
Only patients with mutations detected in at least one of blood or tissue (n=40)
	primary	met
discordant	14	3	17
	0.4667	0.3	0.2048
concordant	16	7	23
	0.5333	0.7	0.7952
	30	10	40
	1	1	1
